# Supplementary material for: Peptide thioester synthesis through N→S acyl-transfer: application to the synthesis of a β-defensin
Source: Royal Society of Chemistry journal article supplement (doi:10.1039/b913886b), 2009-01-01
Supplement: b913886b.pdf [file b913886b.pdf]

**Supporting Information for Peptide thioester synthesis through N-S acyl-transfer:  
Application to the synthesis of a beta-Defensin.**

Jaskiranjit Kang, Natalie L. Reynolds, Christine Tyrrell, Julia Dorin, and Derek Macmillan\*

**10 % MAA (D<sub>2</sub>O)**

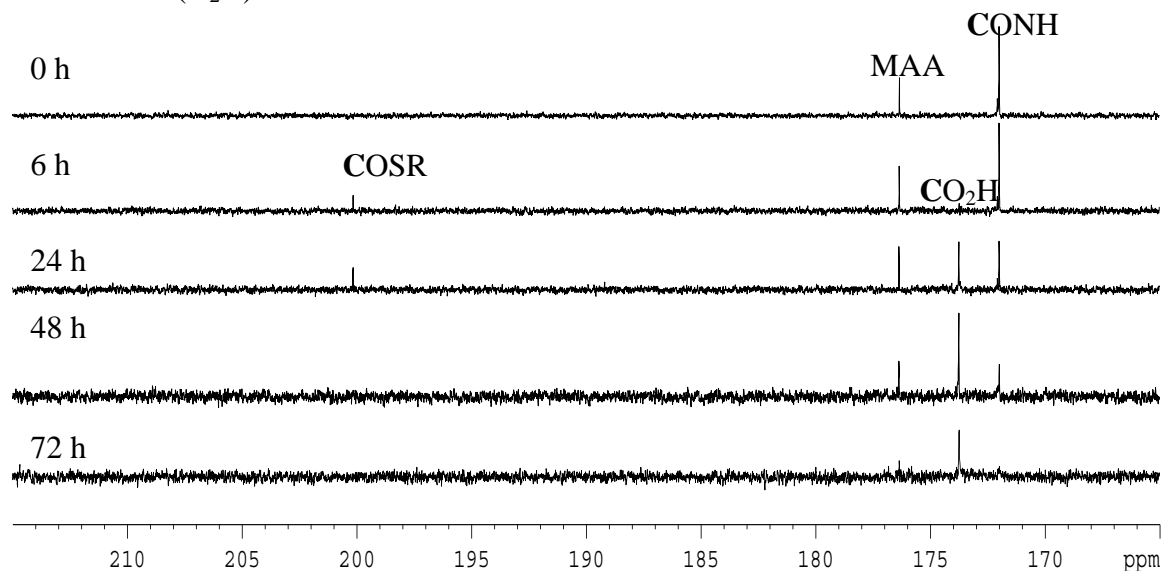

**10 % MPA (D<sub>2</sub>O)**

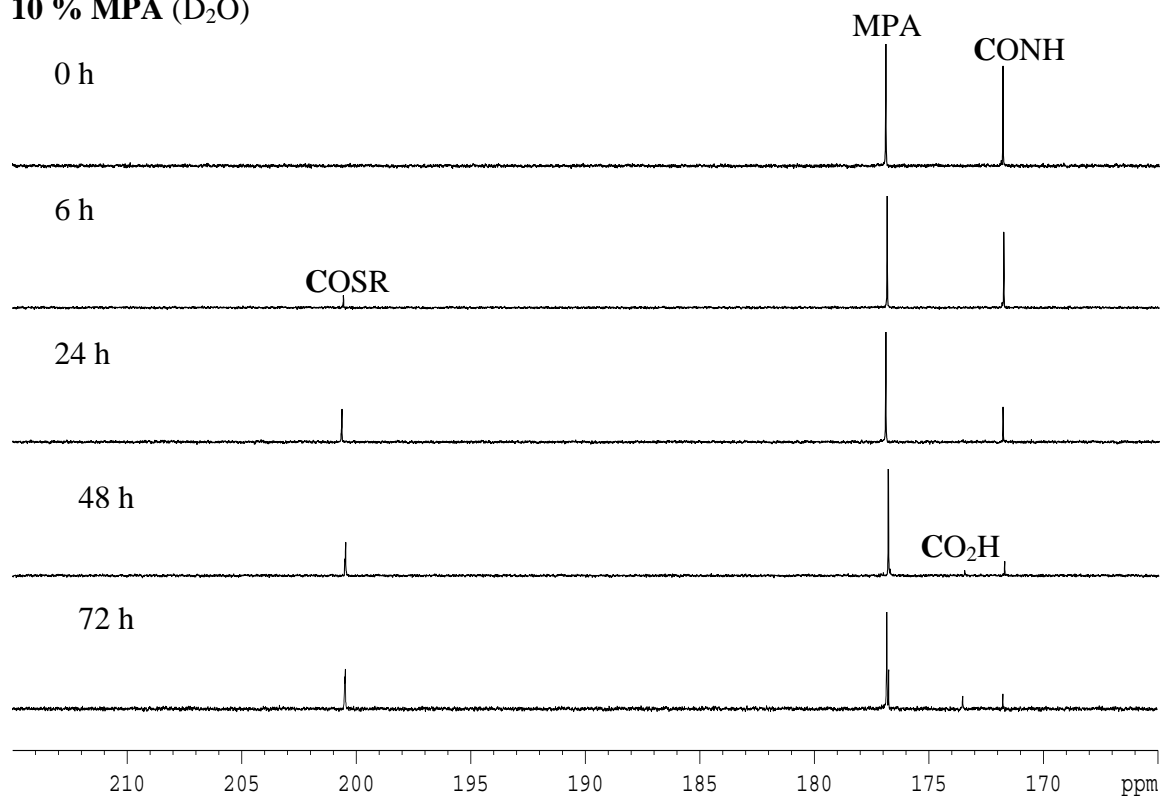

10 % MESNa, 1 % AcOH (D<sub>2</sub>O)

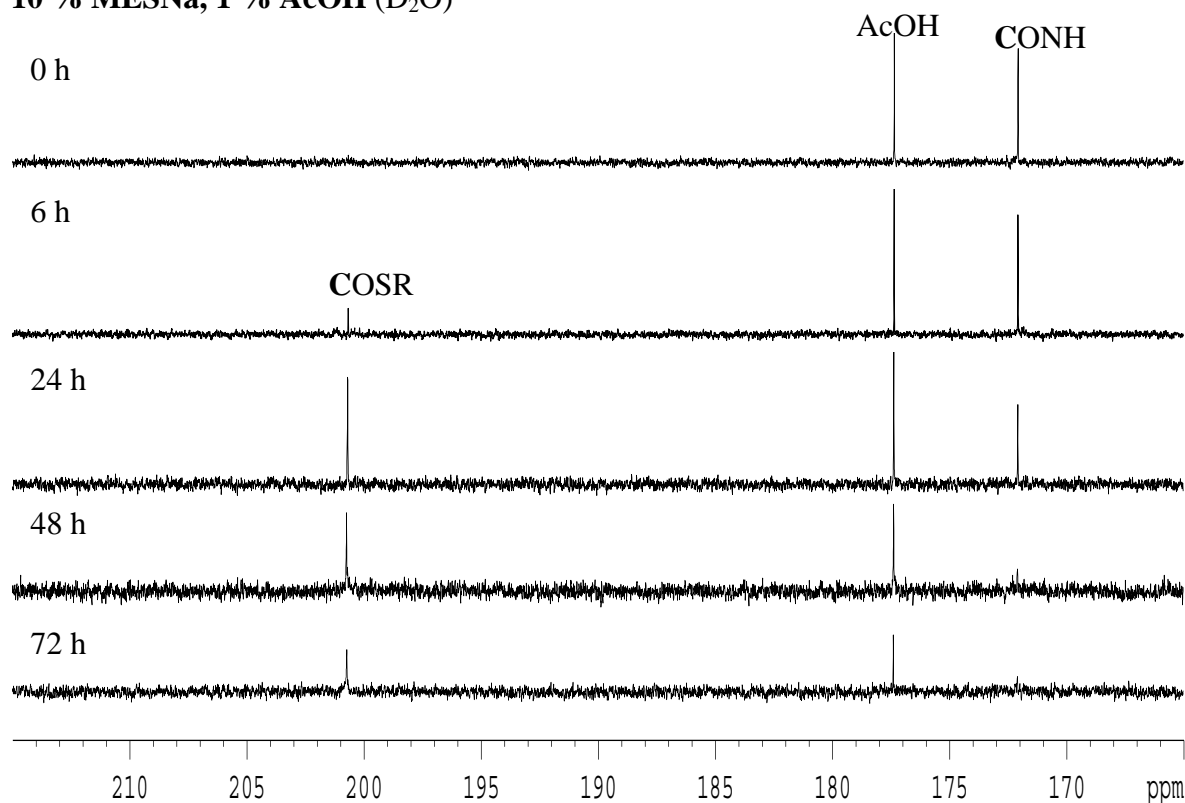

*Biological application of novel peptide thioesterification method: synthesis of human  $\beta$ -defensin 3 (HBD3) with a Ser22His mutation*

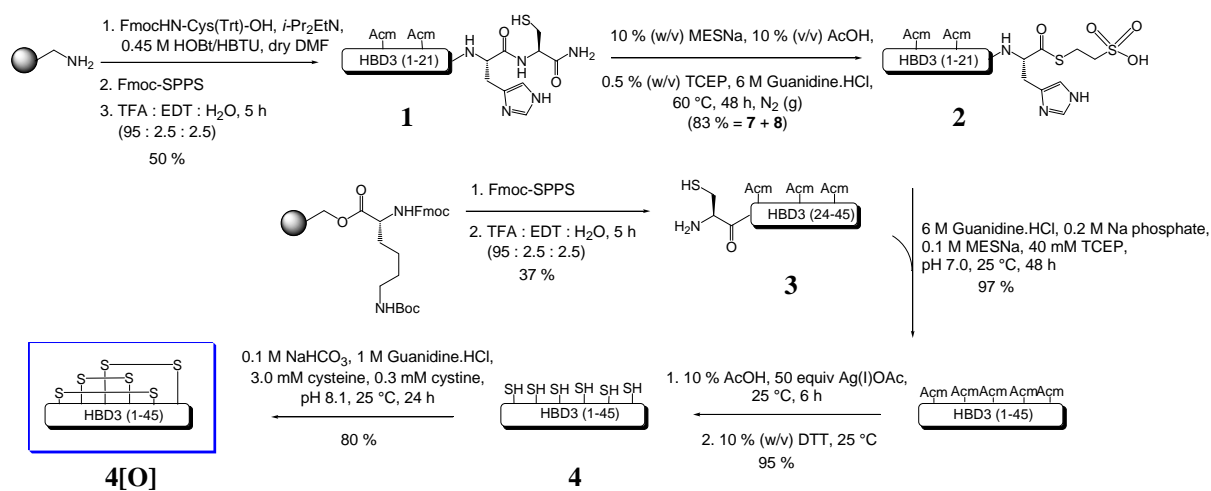

**Scheme 2.** Synthesis of full-length oxidised HBD3 13

HPLC analysis of key transformations in the synthesis of folded HBD3 using the optimised peptide thioesterification procedure, with a linear gradient of 5-50 % MeCN over 45 min in 0.1 % aqueous TFA at a flow rate of 4.0 mLmin<sup>-1</sup>, absorption detected at 230 nm.

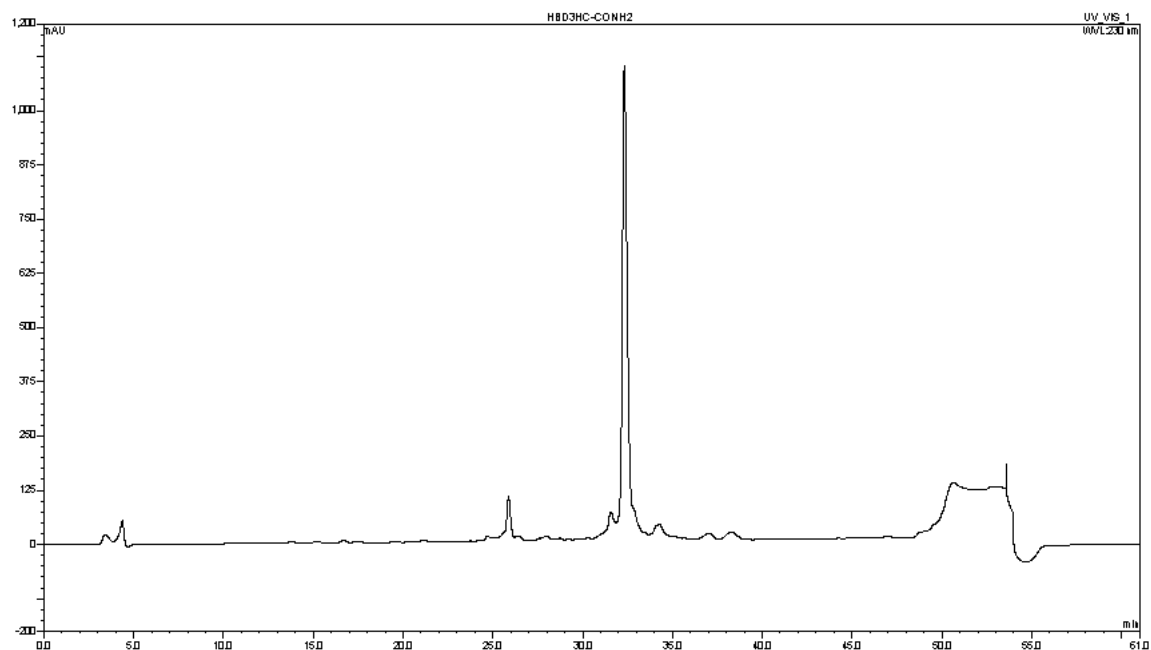

Starting material (1): HBD3(1-21)HC-NH<sub>2</sub>: 32.3 min.

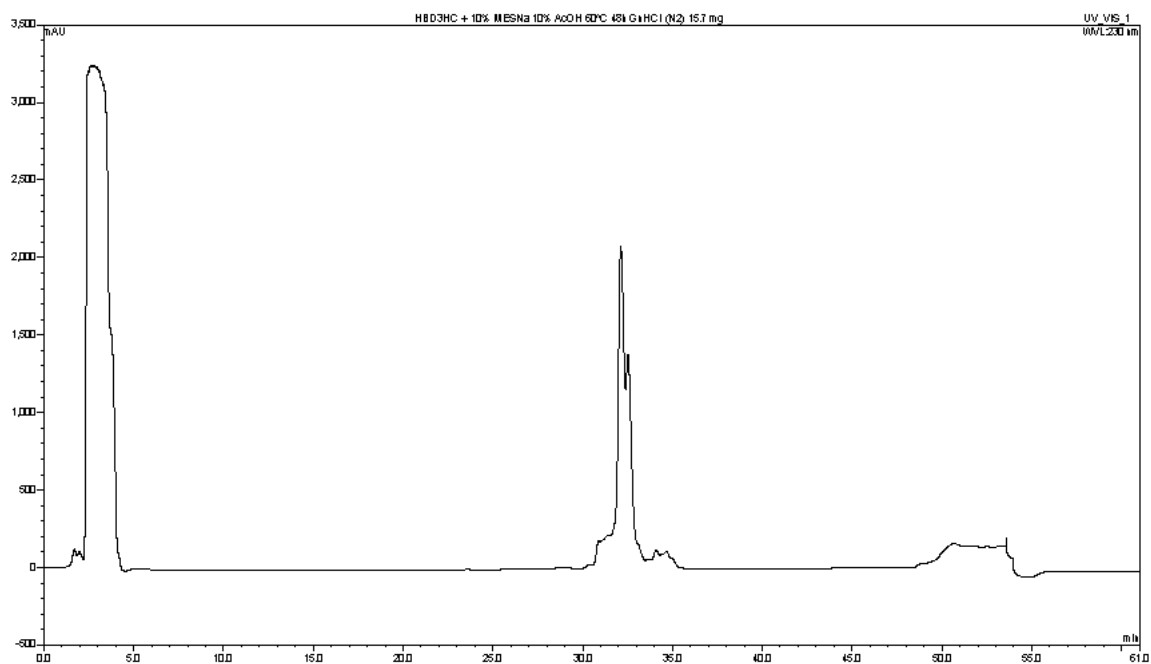

Peptide thioester: co-eluted HBD3(1-21)HC-NH<sub>2</sub> (1) + HBD3(1-21)H-SCH<sub>2</sub>CH<sub>2</sub>SO<sub>3</sub>H (2):  
32.1 and 32.5 min.

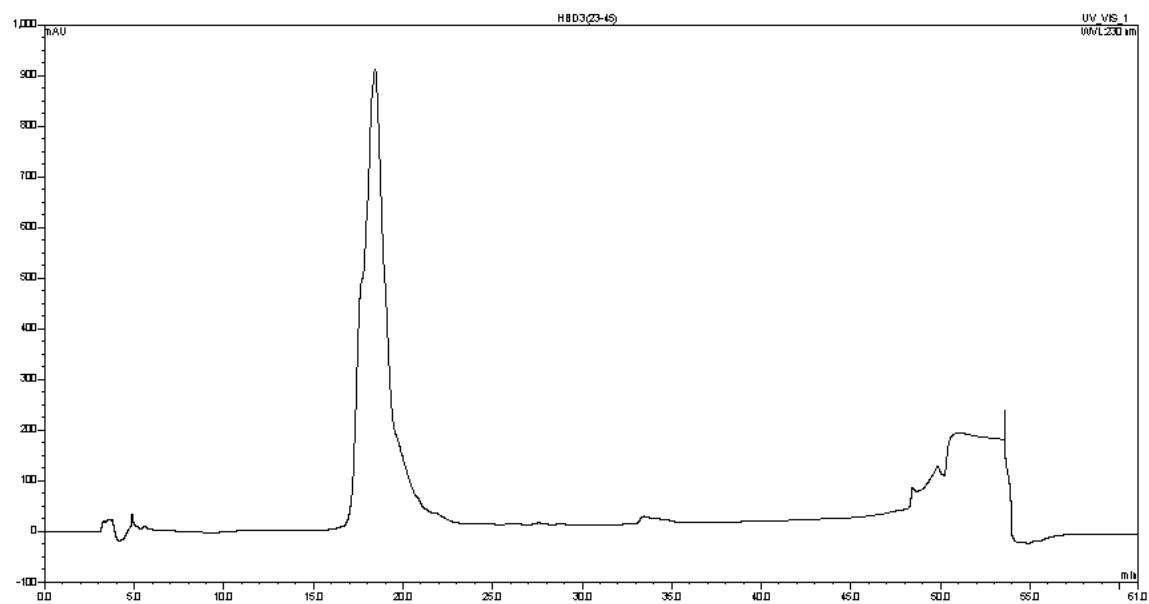

Cysteiny peptide: HBD3(23-45) **3**: 18.4 min.

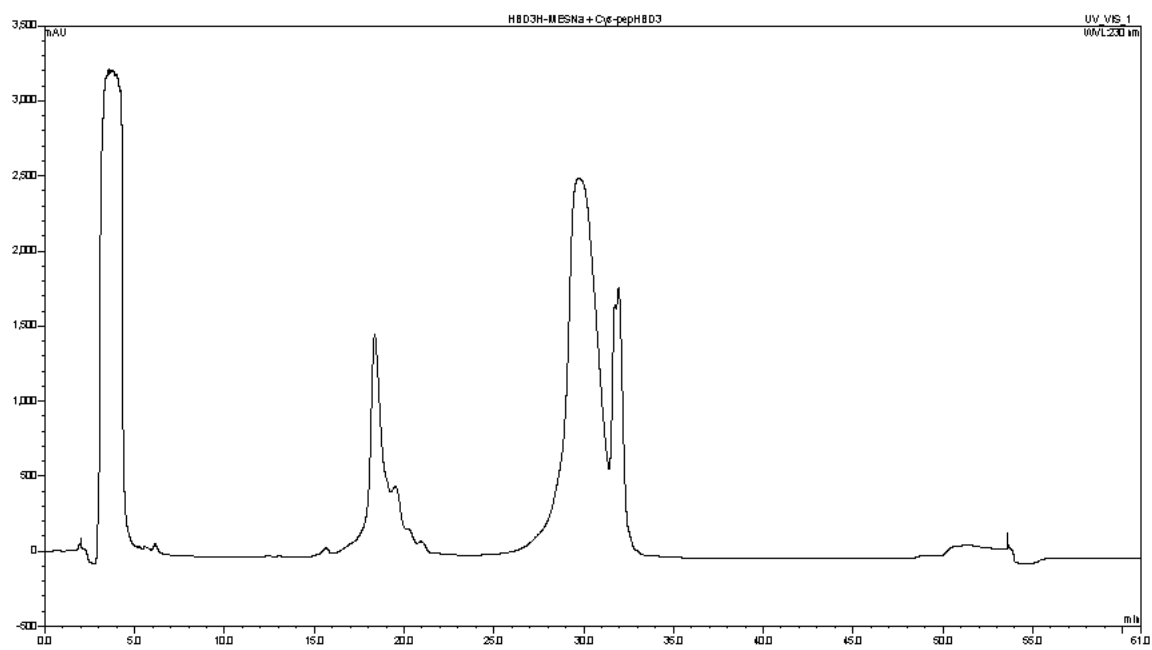

Native chemical ligation: Cys-peptide: 18.4 min, HBD3(1-45) + Ac<sub>m</sub><sub>5</sub>: 29.7 min, unreacted SM: 32.0 min.

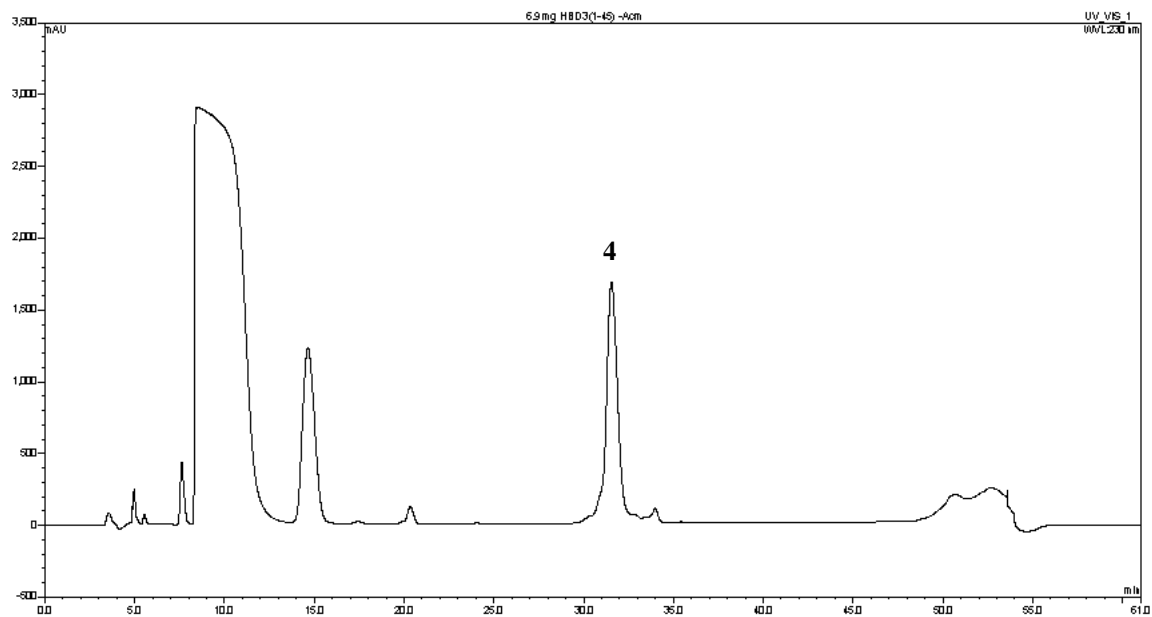

Deprotected full-length HBD3(1-45) – Ac<sub>m</sub><sub>5</sub>: 31.6 min.

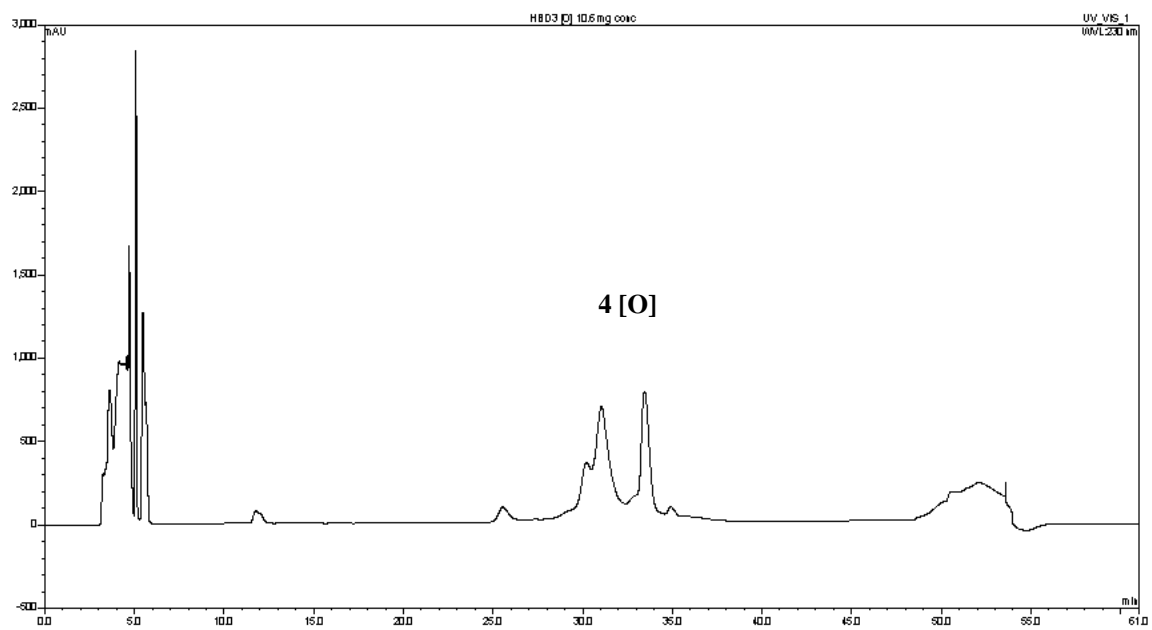

Oxidised full-length HBD3(1-45): 30.2, 31.1, and 33.5 min.

Mass spectra of key transformation in the synthesis of HBD3(1-45).

**HBD3(1-21)HC-NH<sub>2</sub> (1)**

HBD3 HC 30,31 142 (1.288) M1 [Ev-103045,It30] (Gs,1,000,500:2000,1.00,L30,R30); Cm (131:183)

1: Scan ES+  
2.45e8

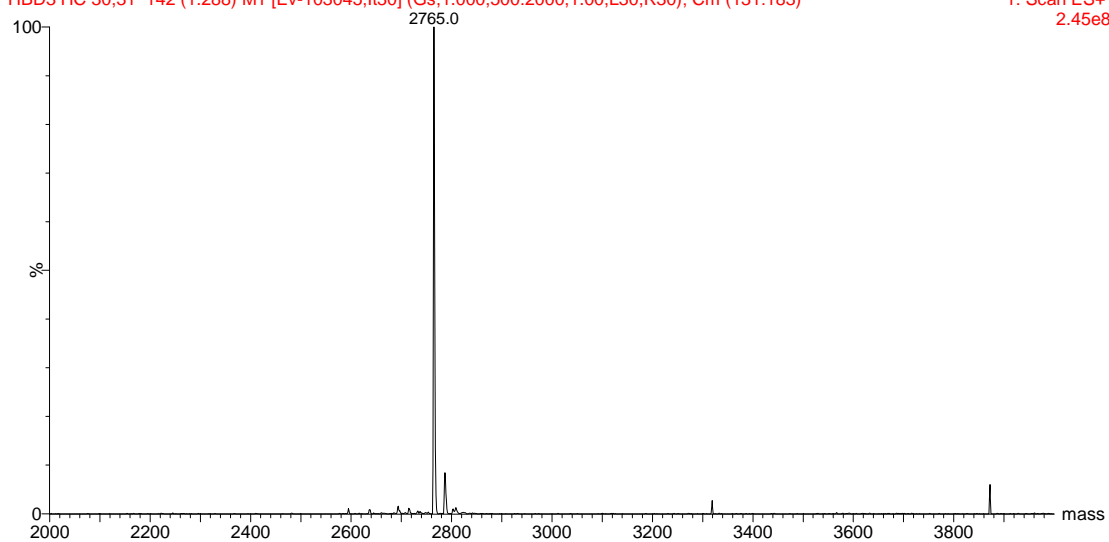

HBD3 HC 30,31 142 (1.288) Cm (131:183)

1: Scan ES+  
2.82e7

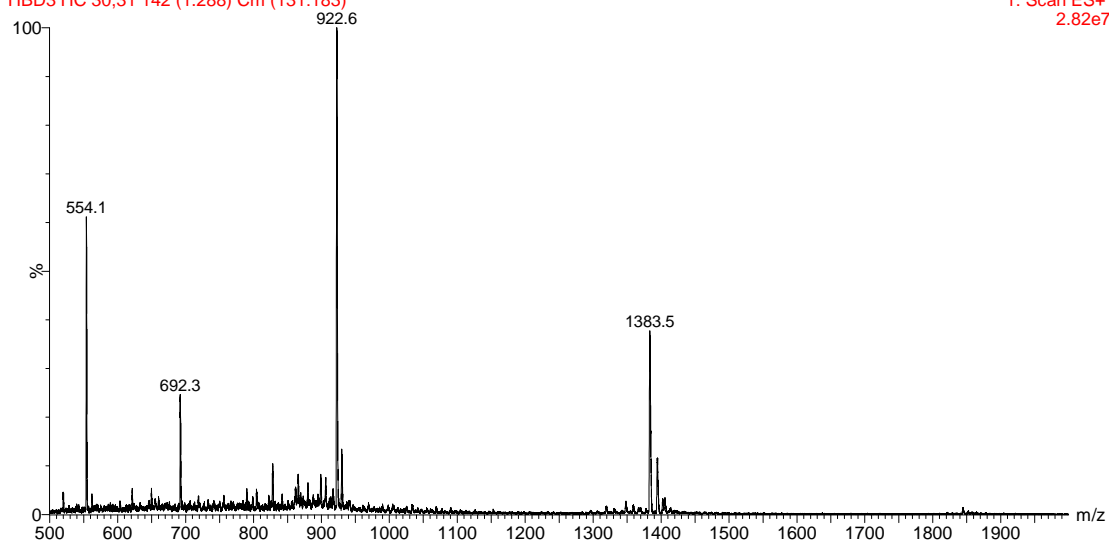

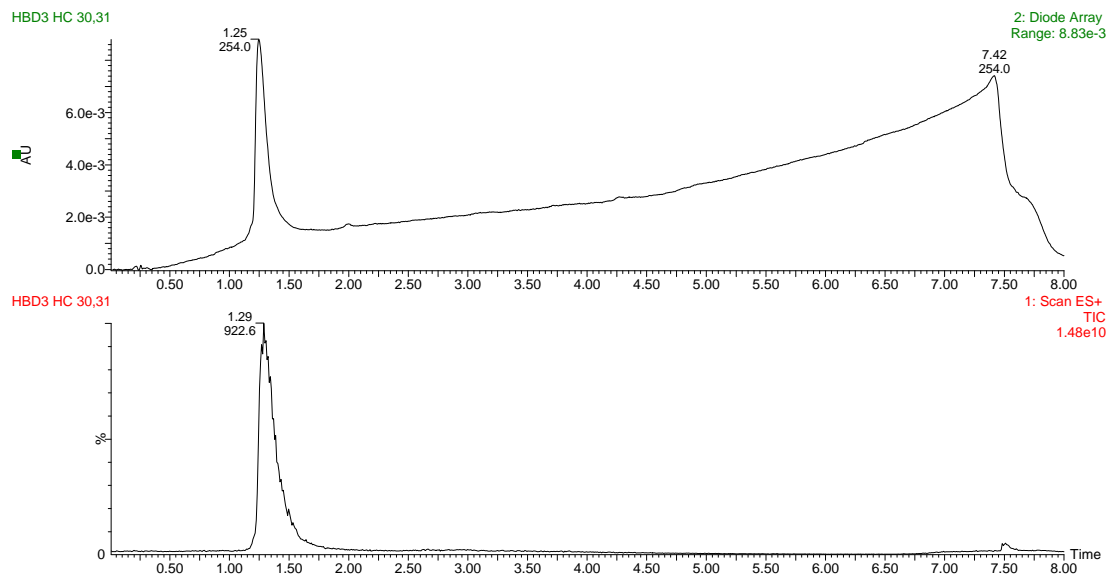

**HBD3(1-21)HC-NH<sub>2</sub> + HBD3(1-21)H-SCH<sub>2</sub>CH<sub>2</sub>SO<sub>3</sub>H (1 + 2)**

HBD3-H-MESNa 15 mg N2 48 h

1: Scan ES+  
TIC  
6.85e9

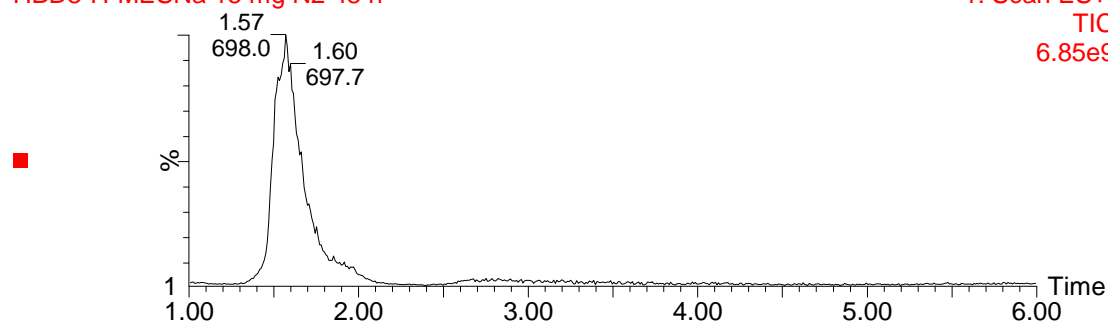

HBD3-H-MESNa 15 mg N2 48 h 173 (1.570) M1 [Ev-100553,It26] (Gs,1,000,500:2000,1,00,L33,R33); Cm (157:201)

1.17e8

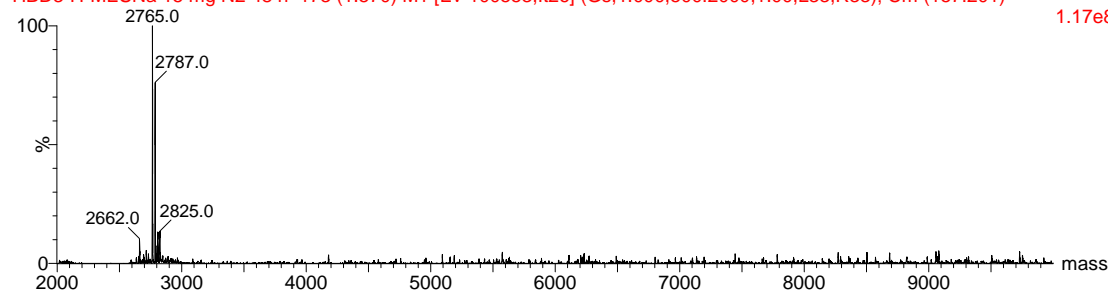

HBD3-H-MESNa 15 mg N2 48 h 173 (1.570) Cm (157:201)

1: Scan ES+  
1.44e7

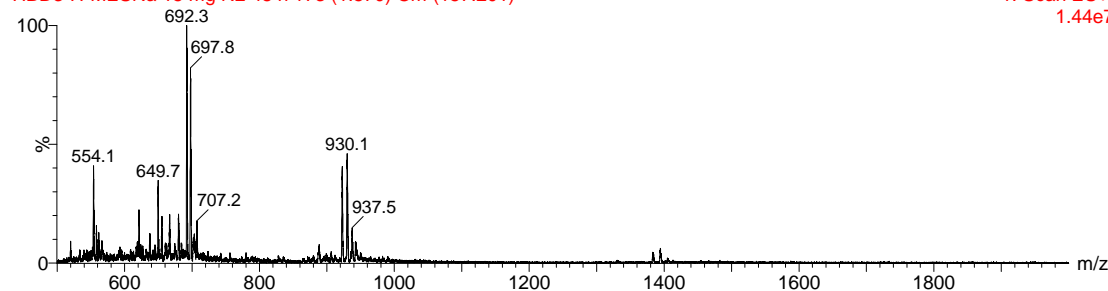

### HBD3(23-45): Cysteinyl peptide (3)

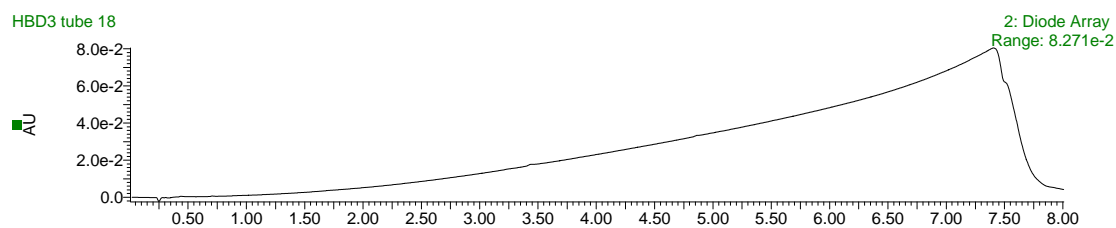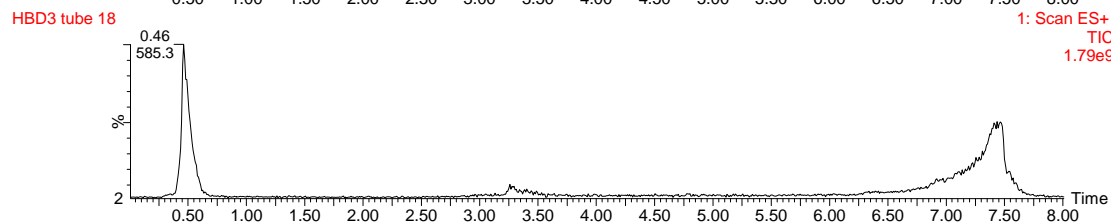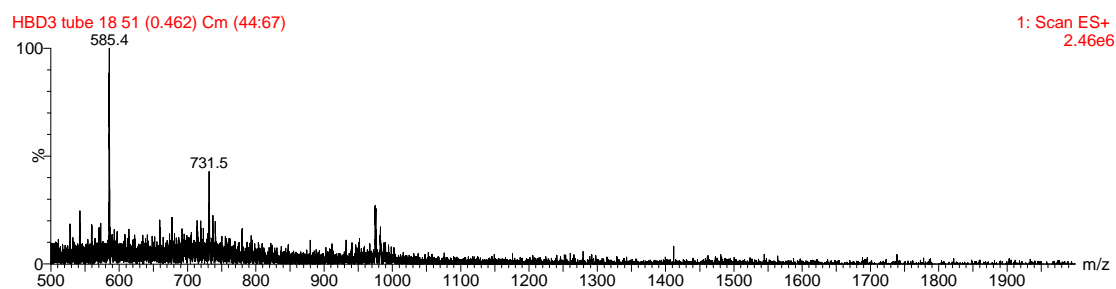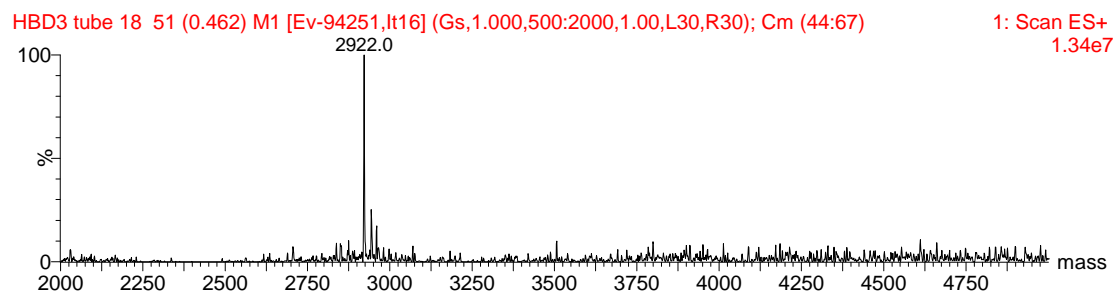

### HBD3(1-45) + Acm<sub>5</sub> ligated product

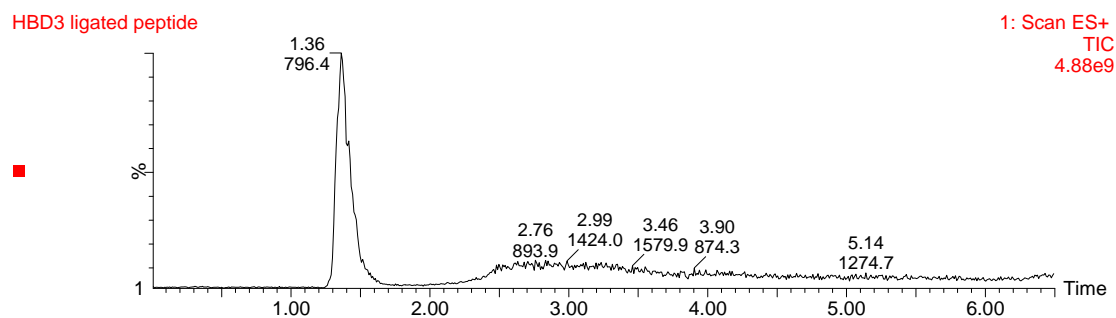



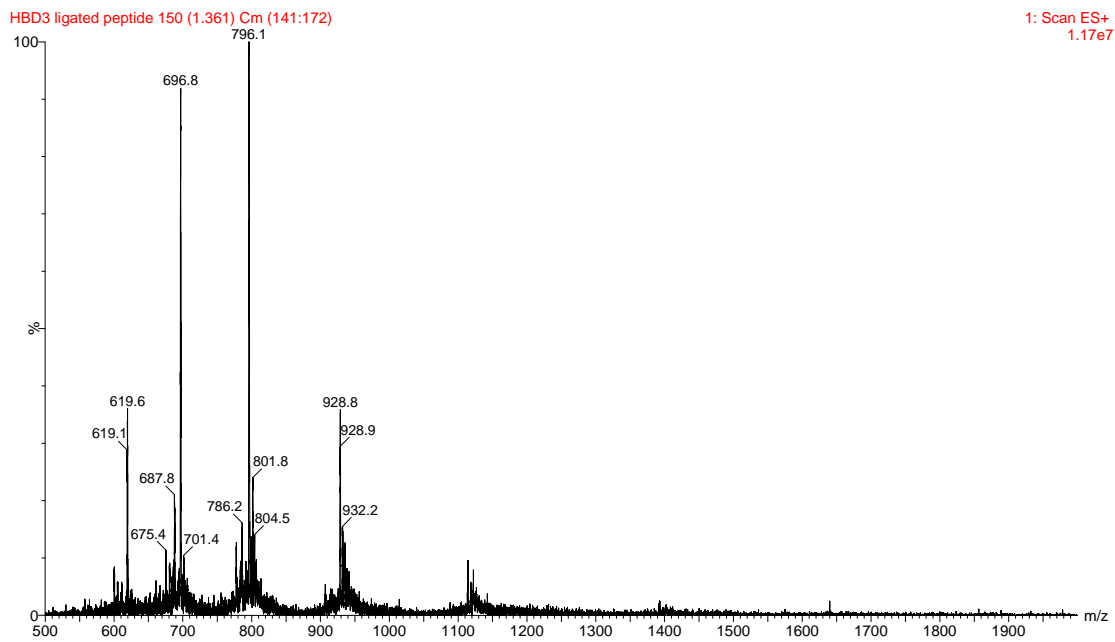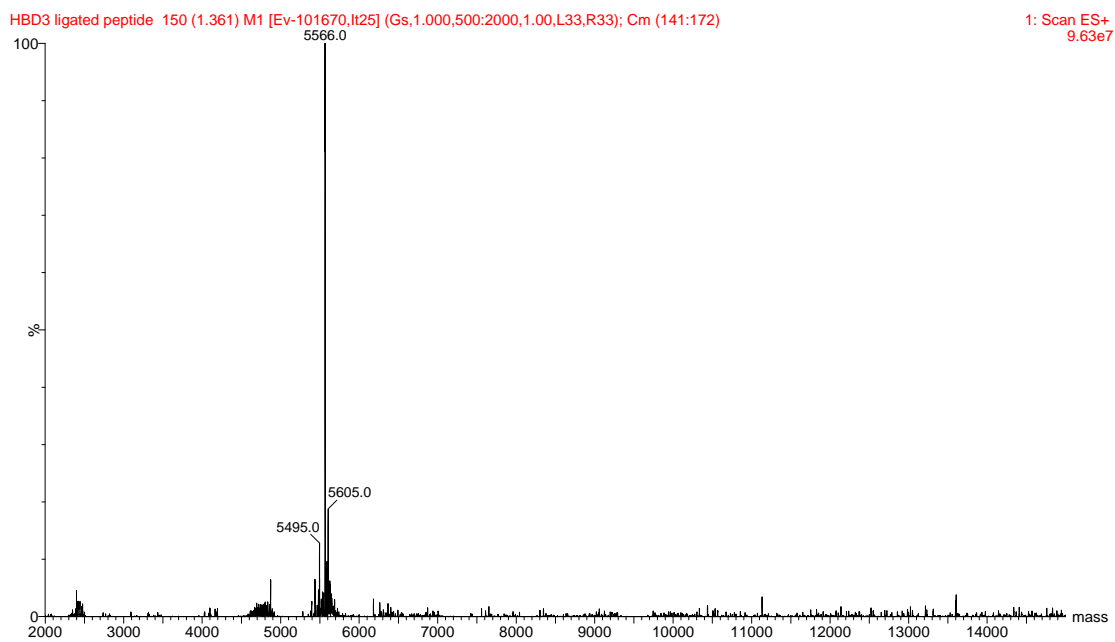

### Deprotected HBD3(1-45) – Acm<sub>5</sub> (4)

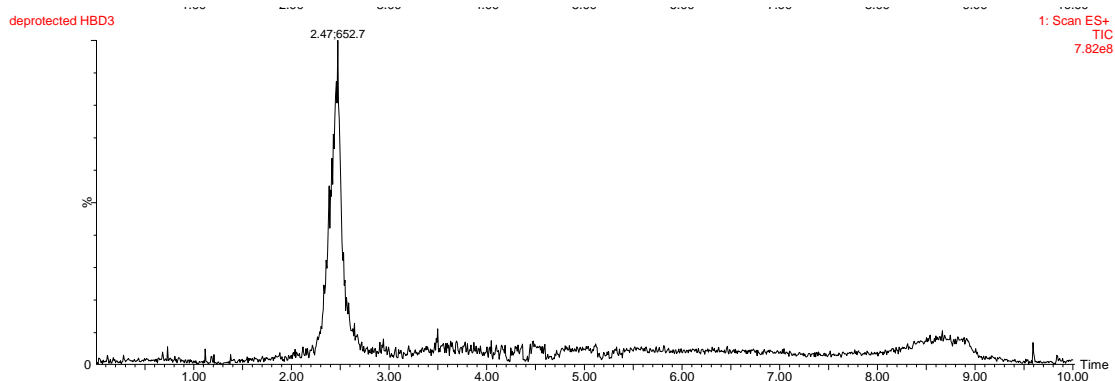

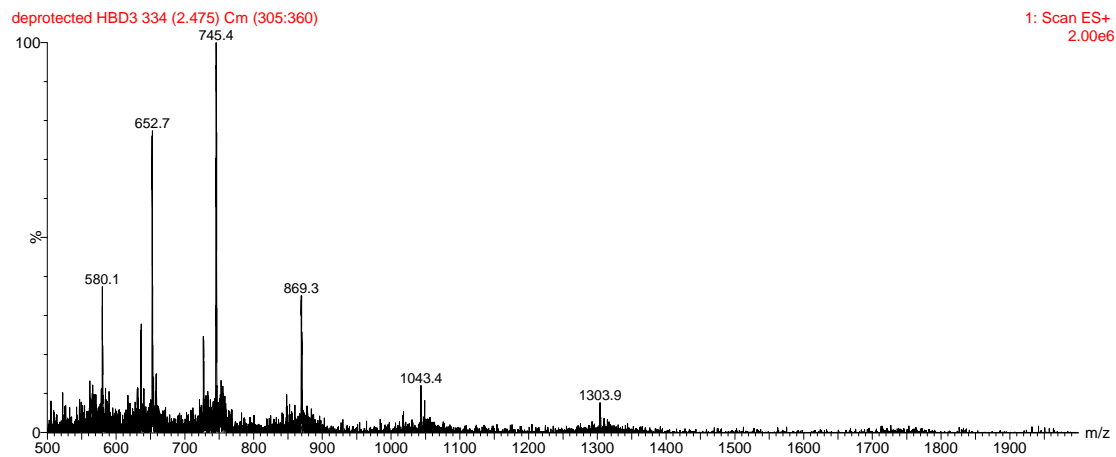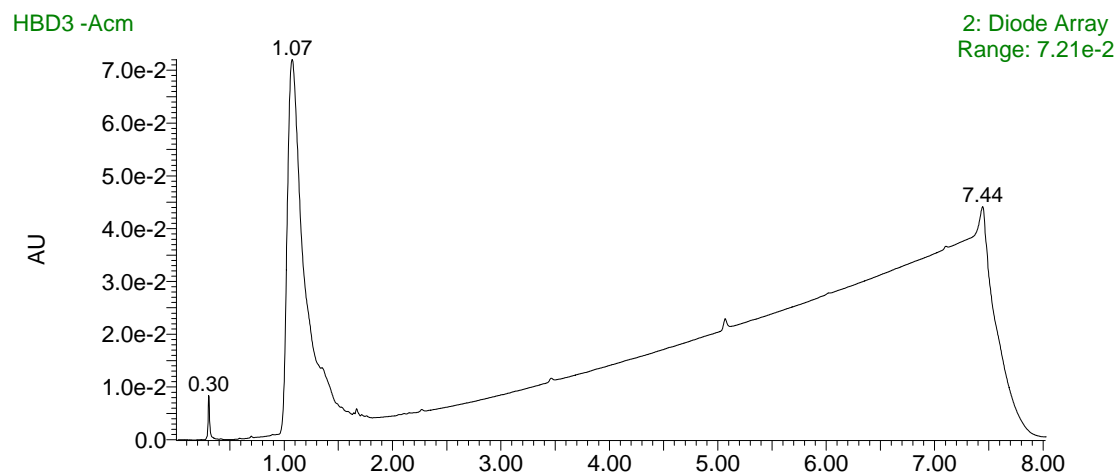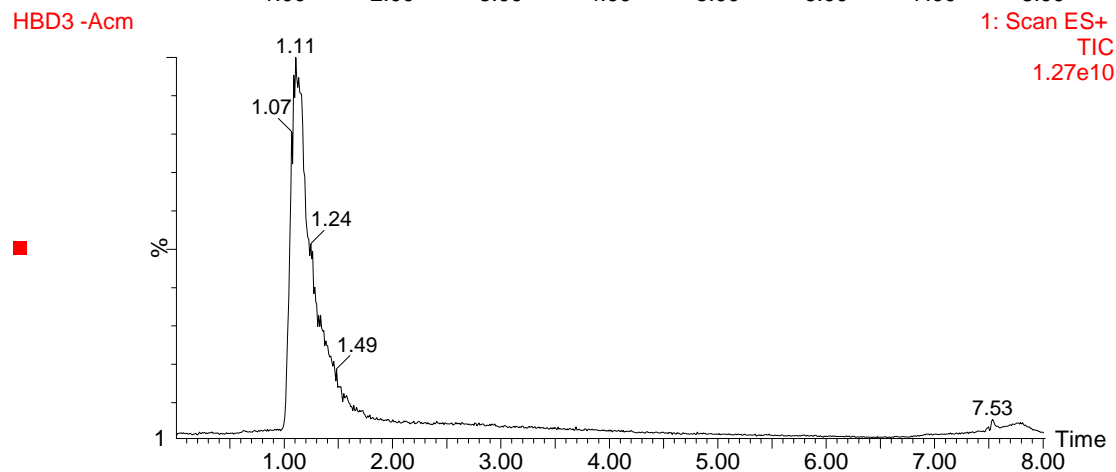

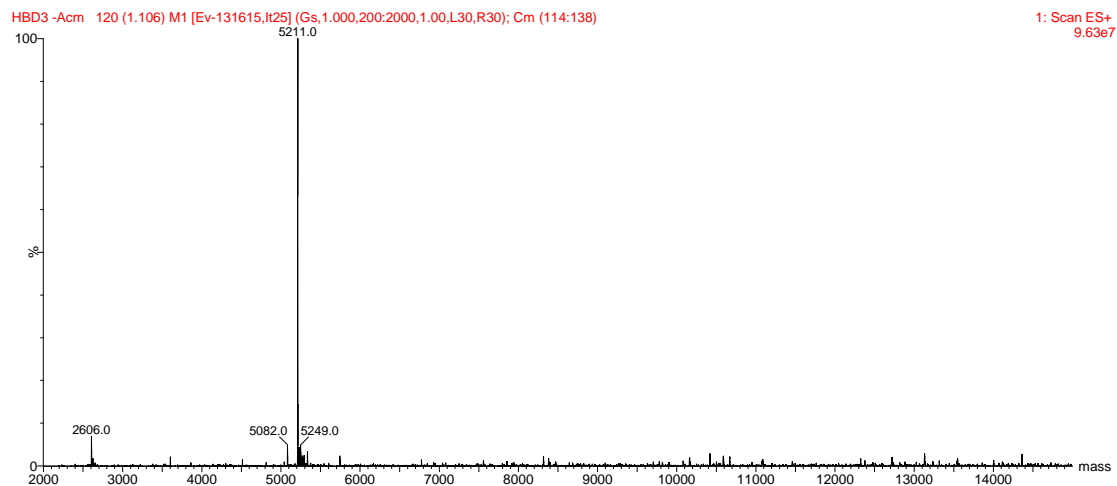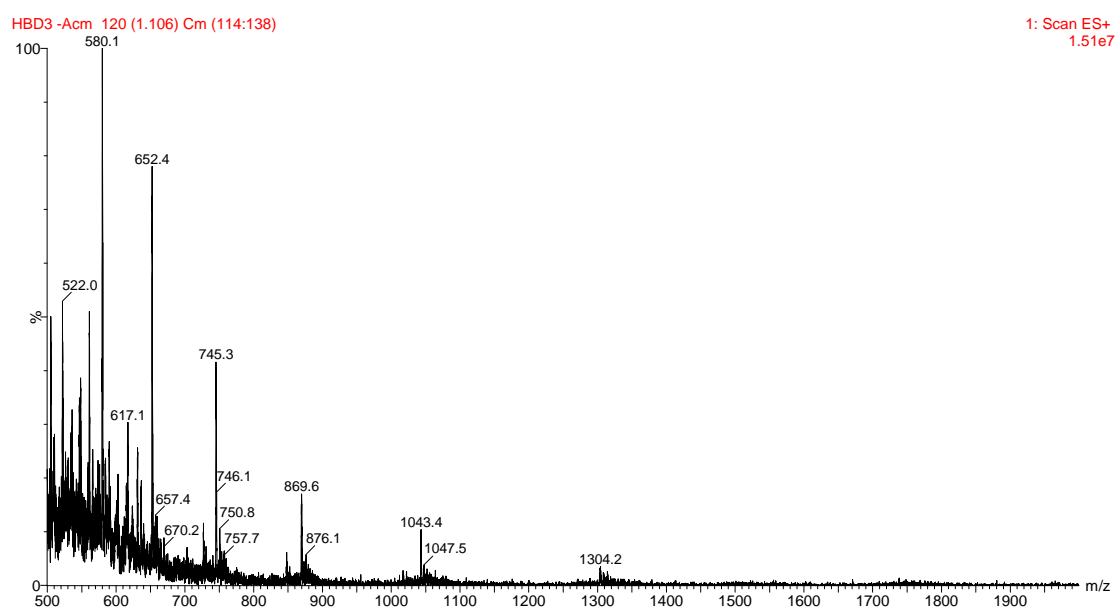

## Folded HBD3(1-45)

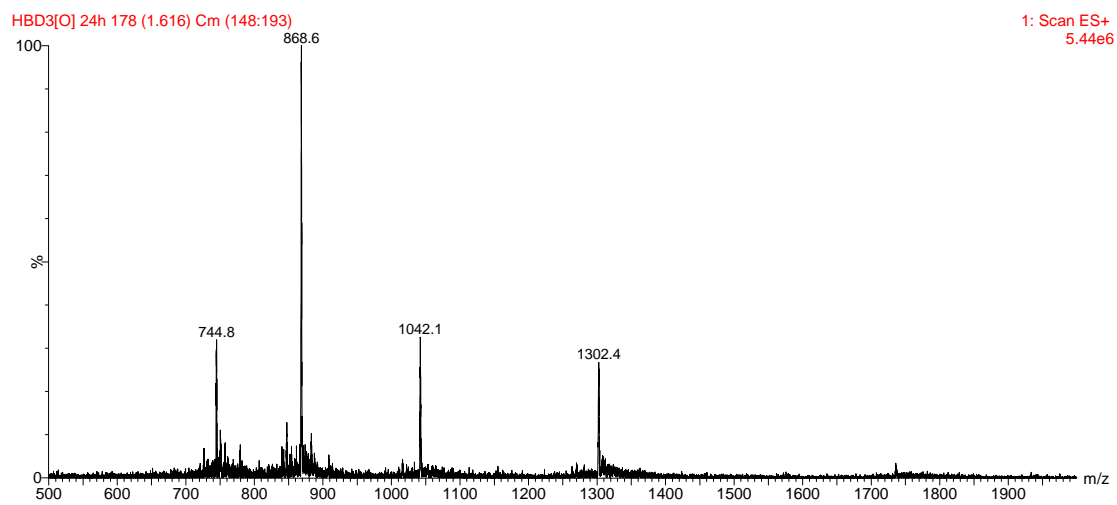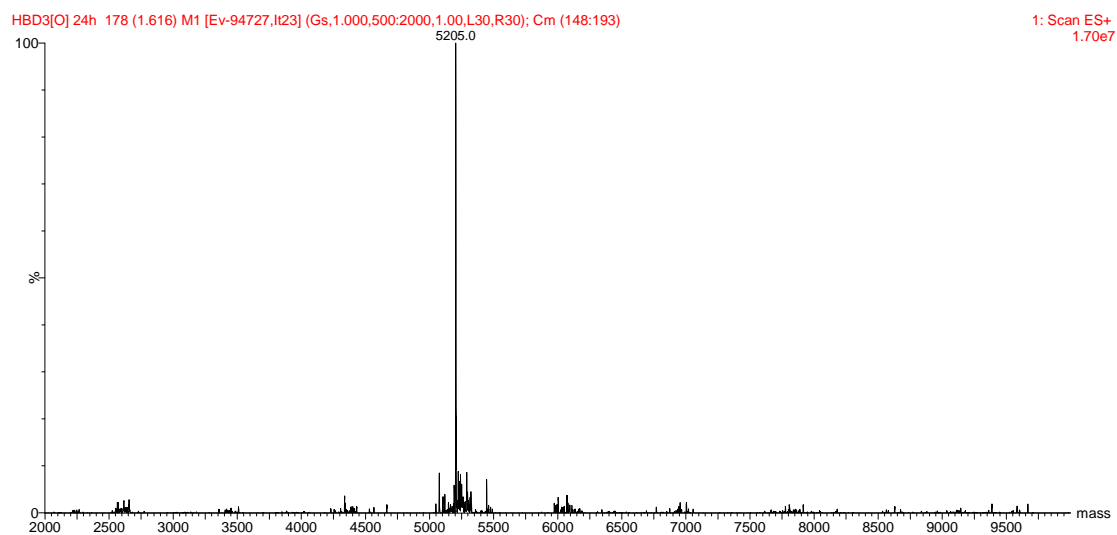

### Peptide concentration dependence in H-AENITTGHC-NH<sub>2</sub> thioesterification

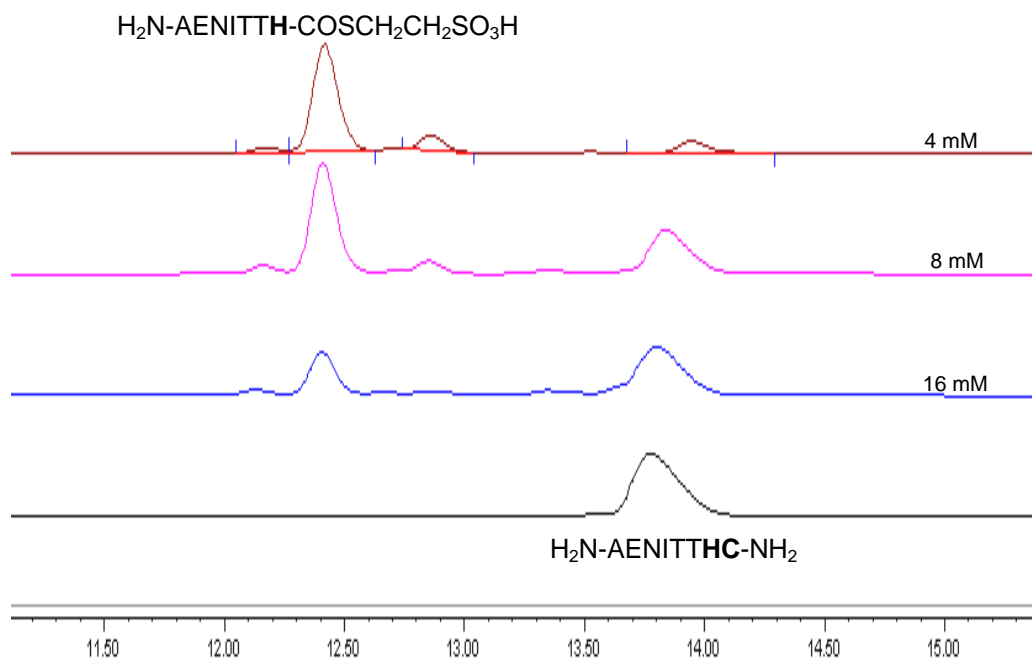

Reactions all performed at 60 °C in 10 % w/v MESNa containing 1% v/v AcOH for 24 h.
